# Supplementary material for: Utility of the Korean Modified Early Warning Score (KMEWS) as a Triage Screening Tool in the Emergency Department in Patients with Infection
Source: Research Square preprint supplement (doi:10.21203/rs.3.rs-538791/v1), 2021-05-27
Supplement: Supplementary file 1 [file b4d8869aad2ef3d0be3f793a.docx]

Supplement Table 2. Definitions, related conditions, and corresponding medical actions of the KTAS

| Level | Definition | Related conditions | Corresponding medical actions |
| --- | --- | --- | --- |
| I  (Resuscitation) | Condition poses a threat to the patient’s life or extremities | Cardiac arrest, major trauma associated with shock, severe respiratory failure, severely decreased mentation (GCS 3–8) | Immediate aggressive intervention is required |
| II  (Emergent) | Condition has the potential to put the patient’s life, limbs, or body function at risk | Moderate respiratory failure, hematemesis, symptomatic hypertension (SBP > 220 or DBP > 130), moderately decreased mentation (GCS 9–13), fever (BT > 38°C, SIRS > 3, or SIRS > 2 with suspected infection), severe chest pain, abdominal pain (NRS > 7), severe headache, major trauma | Early intervention is required |
| III  (Urgent) | Condition can eventually lead to serious complications | Mild respiratory failure, asymptomatic hypertension (SBP > 220 or DBP > 130), vomiting and/or nausea (mild dehydration), moderate abdominal pain (NRS 4–7), moderate headache (NRS 4–7), non-controllable bloody diarrhea | Immediate intervention is not necessarily required |
| IV  (Less urgent) | Condition is associated with age, pain, or other related patient complications | Confusion, symptom of urinary infection, constipation (NRS < 4), mild pain (NRS < 4) | Intervention or reassessment may be required within 1–2 hr |
| V  (Non-urgent) | Condition is derived from a chronic problem | Mild diarrhea, bite, dressing, drug prescriptions | Examination or intervention can be delayed |

|  |  |  |  |  |  |
| --- | --- | --- | --- | --- | --- |
|  |  |  |  | |  |
|  |  |  |  |  |  |
|  |  |  |  | | |
|  |  |  |  | | |
|  |  |  |  | |  |
