# Supplementary material for: Utility of the Korean Modified Early Warning Score (KMEWS) as a Triage Screening Tool in the Emergency Department in Patients with Infection
Source: Research Square preprint supplement (doi:10.21203/rs.3.rs-538791/v1), 2021-05-27
Supplement: Supplementary file 2 [file dd749b6d36c7771310811a8a.docx]

Supplement Table 1. Calculation of the Modified Early Warning Score (MEWS).

|  | 3 | 2 | 1 | 0 | 1 | 2 | 3 |
| --- | --- | --- | --- | --- | --- | --- | --- |
| Systolic blood pressure (mmHg) | <70 | 70-80 | 81-100 | 101-199 |  | ≥200 |  |
| Heart rate (bpm) |  | <40 | 40-50 | 50-100 | 101-110 | 111-129 | ≥130 |
| Respiratory rate (bpm) |  | <9 |  | 9-14 | 15-20 | 21-29 | ≥30 |
| Temperature(°C) |  | <35 |  | 35-38.4 |  | ≥38.5 |  |
| AVPU score |  |  |  | Alert | Reacting to Voice | Reacting to Pain | Unresponsive |
